# Supplementary material
Source: PubMed Central journal article supplement (PMC7237777)
Supplement: AEM.00122-20-s0001.pdf [file AEM.00122-20-s0001.pdf]

## SUPPLEMENTAL MATERIALS

### Synergistic effects of a chalkophore, methanobactin, on microbial methylation of mercury

Xixiang Yin,<sup>1,2,¶</sup> Lihong Wang,<sup>2,3,¶</sup> Lijie Zhang,<sup>2</sup> Hongmei Chen,<sup>2,4</sup> Xujun Liang,<sup>2,5</sup> Xia Lu,<sup>2</sup>

Alan A. DiSpirito,<sup>6</sup> Jeremy D. Semrau<sup>7</sup> and Baohua Gu<sup>2,5\*</sup>

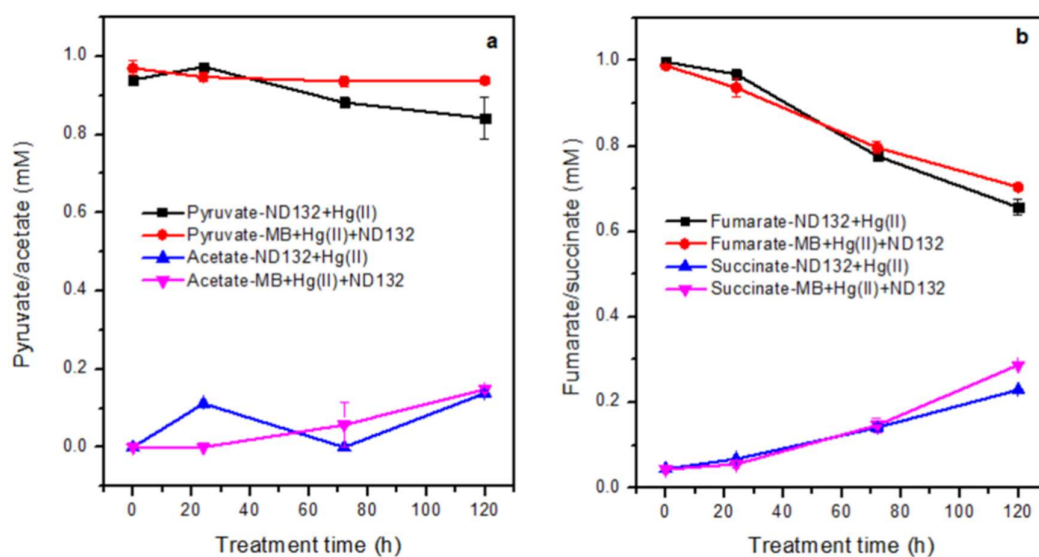

**Fig. S1.** Determination of metabolic activities of washed cells of *D. desulfuricans* ND132 during Hg(II) methylation assays in the presence or absence of OB3b-MB (25  $\mu$ M) in PBS. No significant differences in the consumption rates of pyruvate and fumarate or the production rates of acetate and succinate were observed either with or without the addition of OB3b-MB.

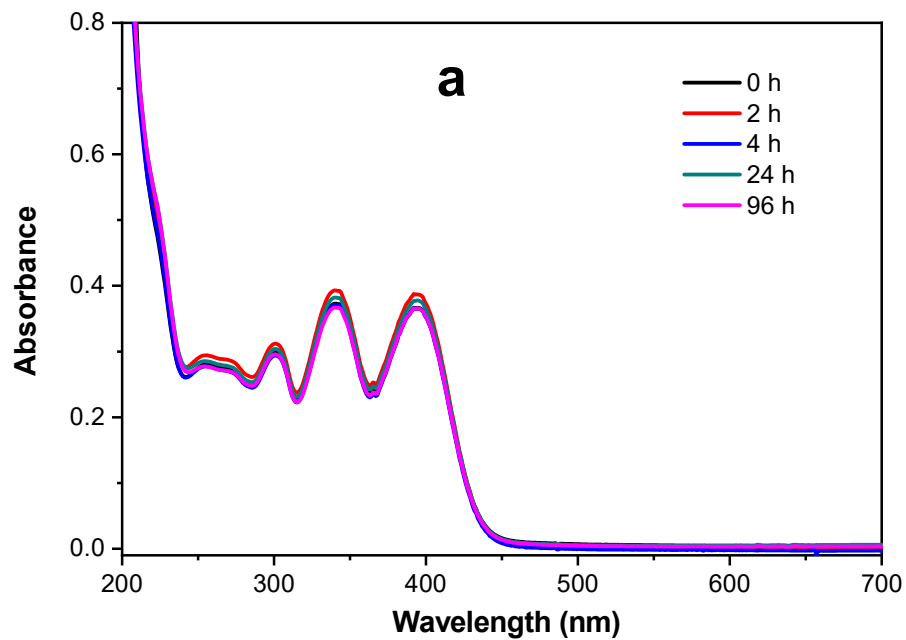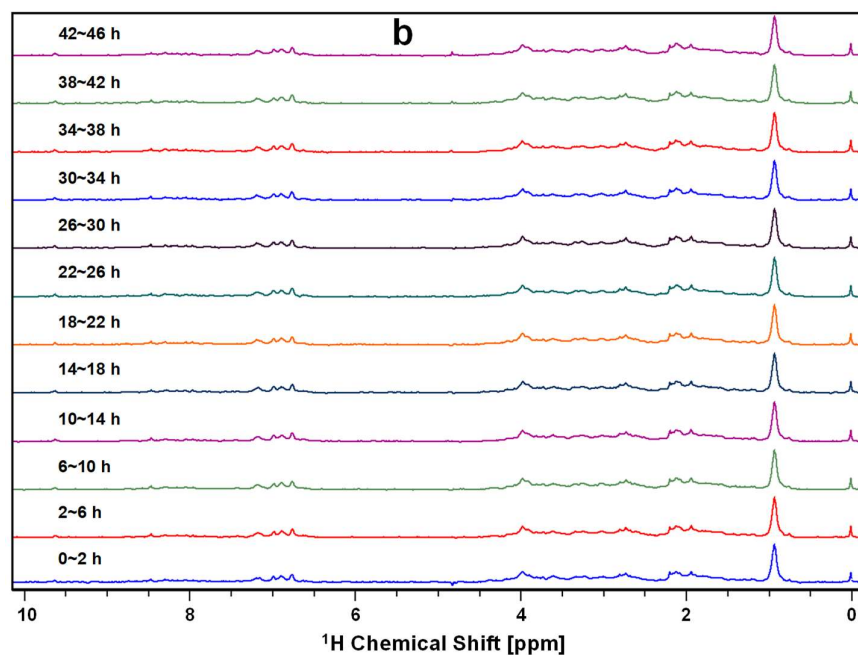

**Fig. S2.** (a) UV-vis and (b) Liquid  $^1\text{H}$  NMR spectroscopic analyses of OB3b-MB stability over time. NMR spectra of OB3b-MB (50  $\mu\text{M}$  in DI  $\text{H}_2\text{O}$ ) were collected up to 46 hours, with 2000 scans accumulated per spectrum.

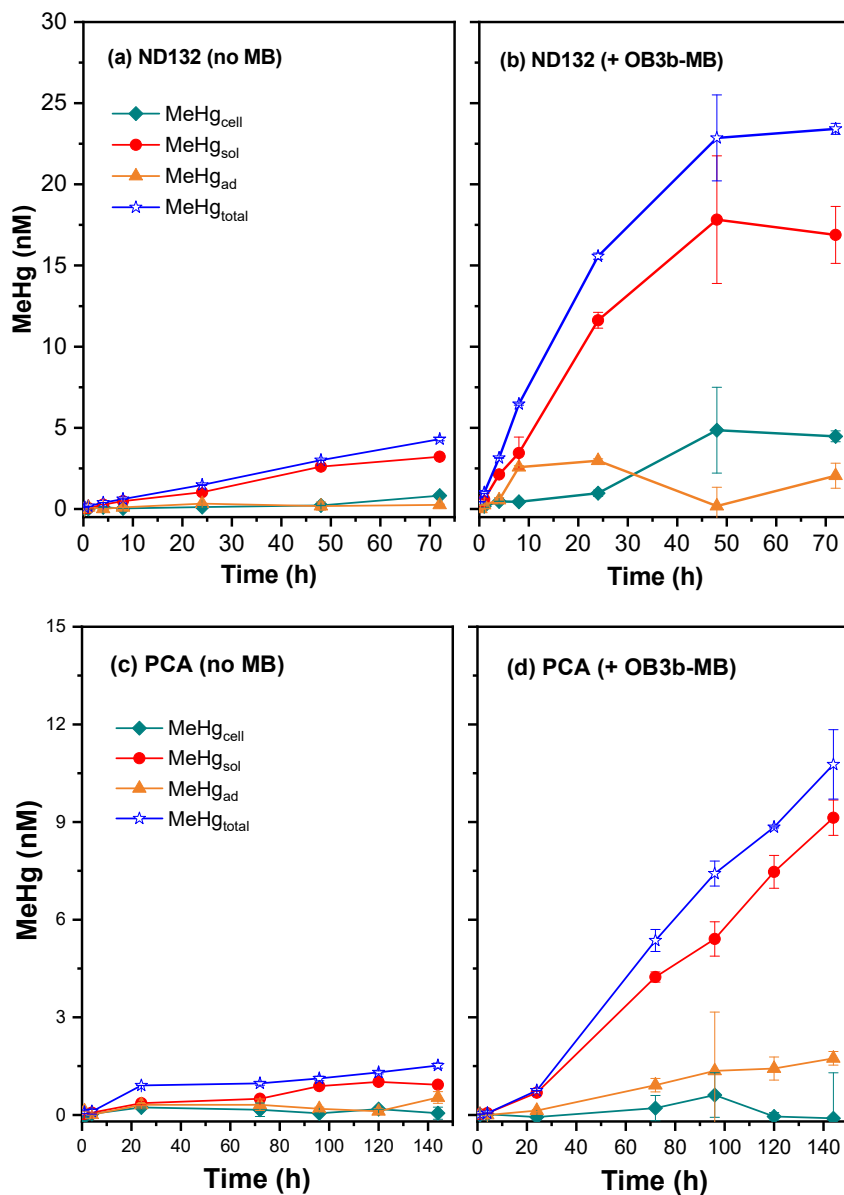

**Fig. S3.** Methylmercury (MeHg) production and species distributions during Hg(II) methylation assays with washed cells of *D. desulfuricans* ND132 (**a, b**) and *G. sulfurreducens* PCA (**c, d**) in PBS. Experiments in (**b**) and (**d**) were performed in the presence of 25  $\mu\text{M}$  OB3b-MB, which was first equilibrated with 25 nM Hg(II) in PBS prior to the additional of cells ( $10^8$  cells  $\text{mL}^{-1}$ ). MeHg<sub>cell</sub>, MeHg<sub>sol</sub>, MeHg<sub>ad</sub>, and MeHg<sub>total</sub> denote concentrations of intracellular MeHg, soluble MeHg, cell-surface adsorbed MeHg, and total MeHg, respectively.

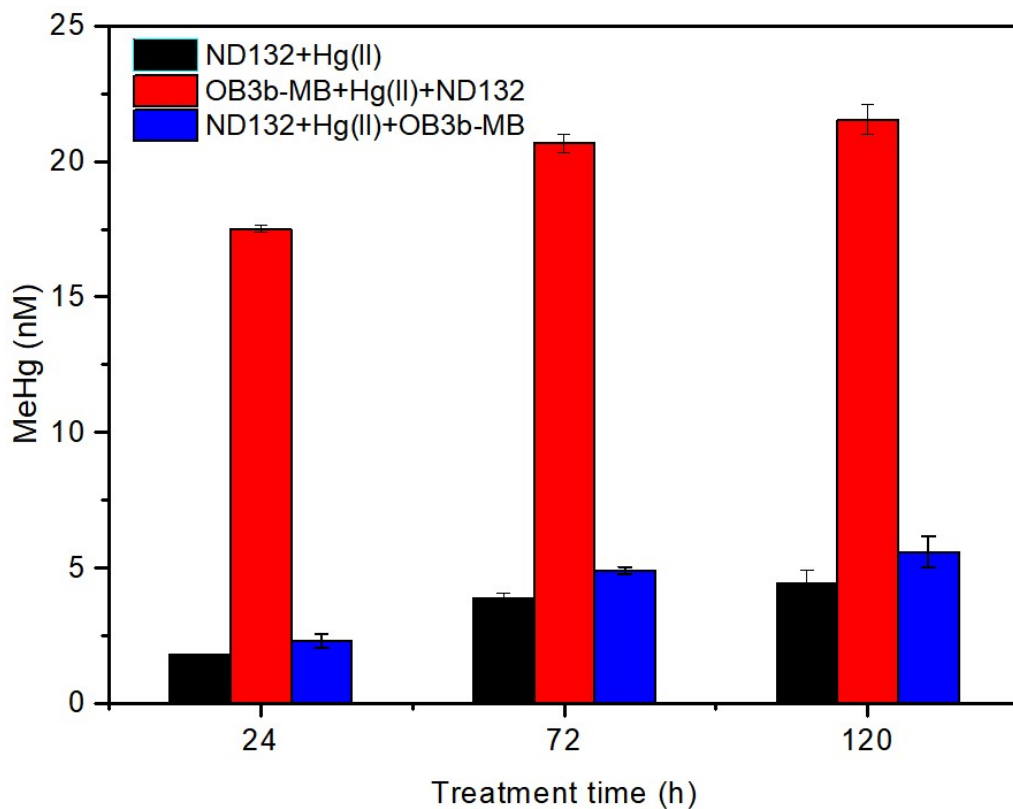

**Fig. S4.** Effects of changing the addition sequence of methanobactin (OB3b-MB), Hg(II), and washed cells of *D. desulfuricans* ND132 on methylmercury (MeHg) production in PBS. The added OB3b-MB concentration was 25  $\mu$ M, and Hg(II) concentration was 25 nM. Little or no enhanced Hg(II) methylation was observed when Hg(II) and ND132 cells were reacted for 1 h prior to the addition of OB3b-MB.

**Table S1.** Molecular weight and chemical structure of the isolated methanobactin (MB) from *M. trichosporium* OB3b (denoted as OB3b-MB) or from *Methylocystis* strain SB2 (denoted as SB2-MB) (1,2,3).

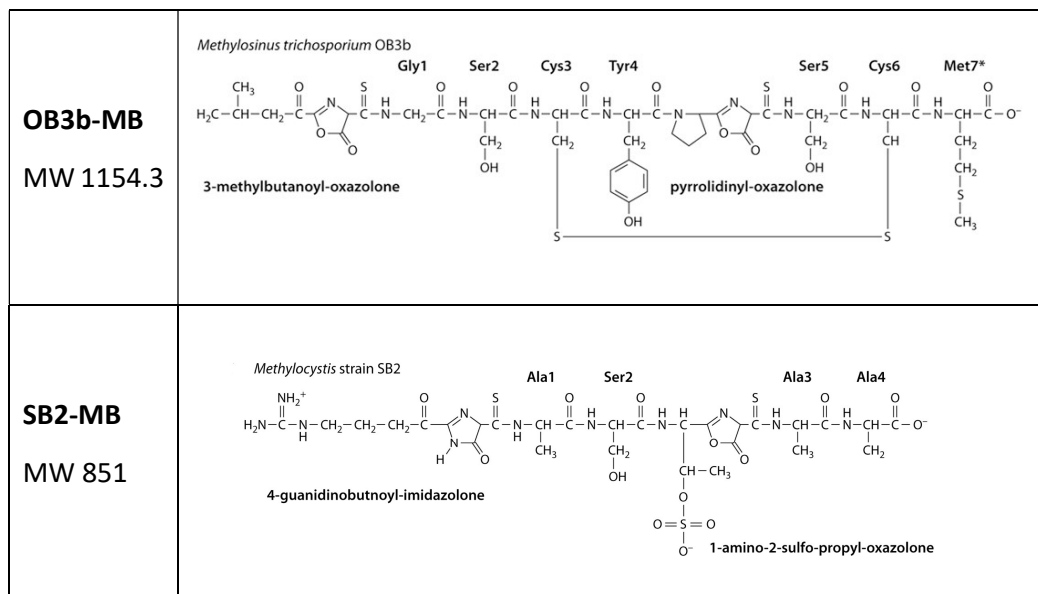

## References

1. Baral, B. S.; Bandow, N. L.; Vorobev, A.; Freemeier, B. C.; Bergman, B. H.; Herdendorf, T. J.; Fuentes, N.; Elias, L.; Turpin, E.; Semrau, J. D.; DiSpirito, A. A., 2014. Mercury binding by methanobactin from *Methylocystis* strain SB2. *J. Inorg. Biochem.* 141, 161-169.
2. Choi, D. W.; Do, Y. S.; Zea, C. J.; McEllistrem, M. T.; Lee, S. W.; Semrau, J. D.; Pohl, N. L.; Kisting, C. J.; Scardino, L. L.; Hartsel, S. C.; Boyd, E. S.; Geesey, G. G.; Riedel, T. P.; Shafe, P. H.; Kranski, K. A.; Tritsch, J. R.; Antholine, W. E.; DiSpirito, A. A., 2006. Spectral and thermodynamic properties of Ag(I), Au(III), Cd(II), Co(II), Fe(III), Hg(II), Mn(II), Ni(II), Pb(II), U(IV), and Zn(II) binding by methanobactin from *Methylosinus trichosporium* OB3b. *J. Inorg. Biochem.* 100, (12), 2150-2161.
3. Vorobev, A.; Jagadevan, S.; Baral, B. S.; DiSpirito, A. A.; Freemeier, B. C.; Bergman, B. H.; Bandow, N. L.; Semrau, J. D., 2013. Detoxification of mercury by methanobactin from *Methylosinus trichosporium* OB3b. *Appl. Environ. Microbiol.* 79, (19), 5918-5926.
